# Supplementary material
Source: PubMed Central journal article supplement (PMC5155348)

## RAW BLOTTING DATA

Figure 1E

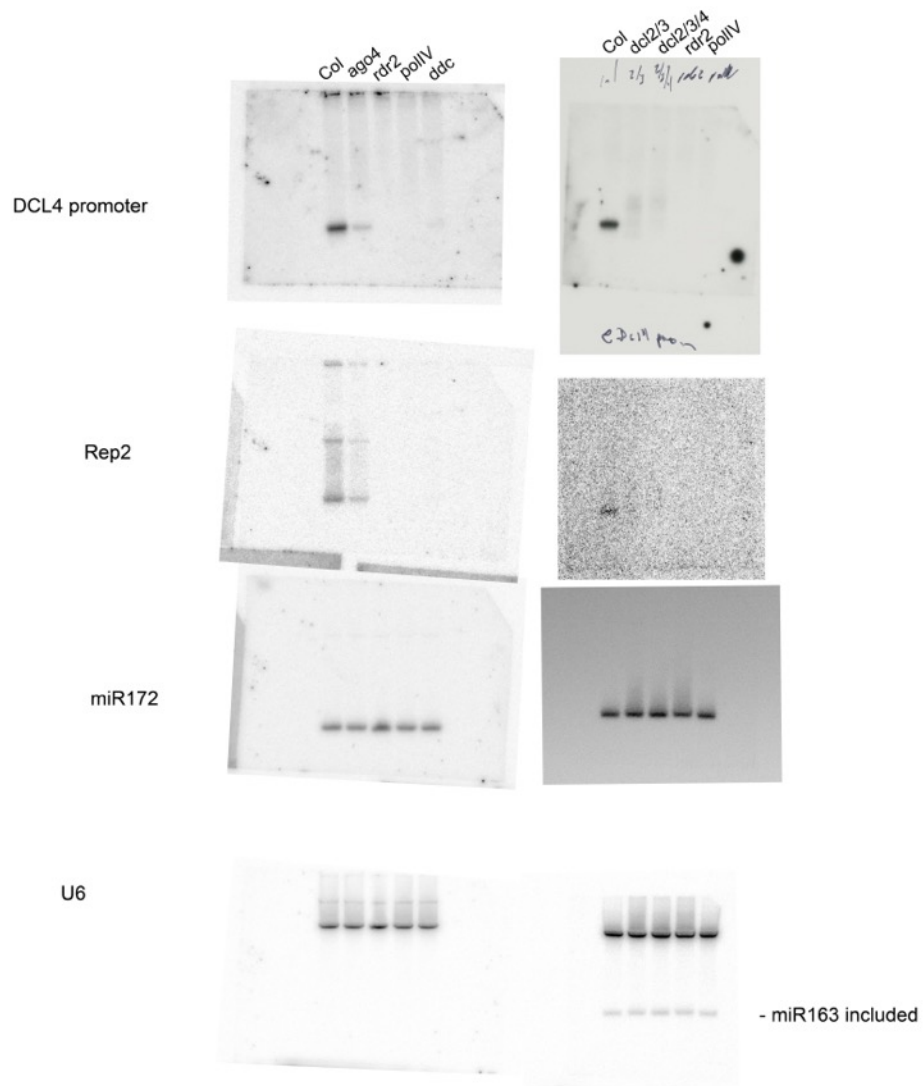

Figure 5B

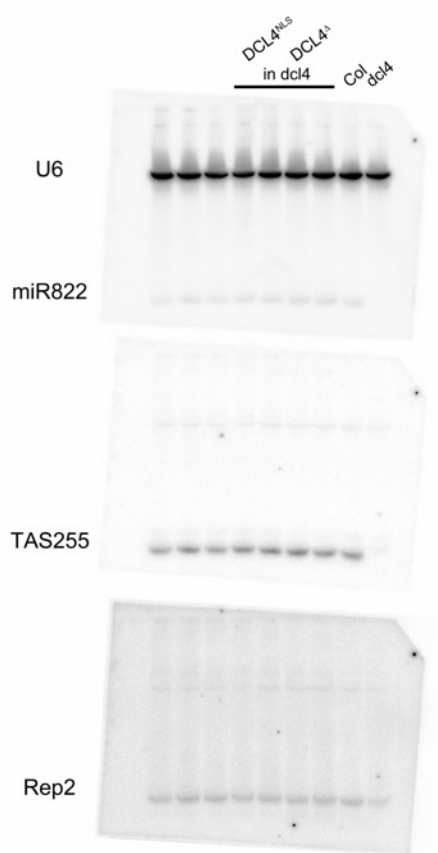

Figure 6C

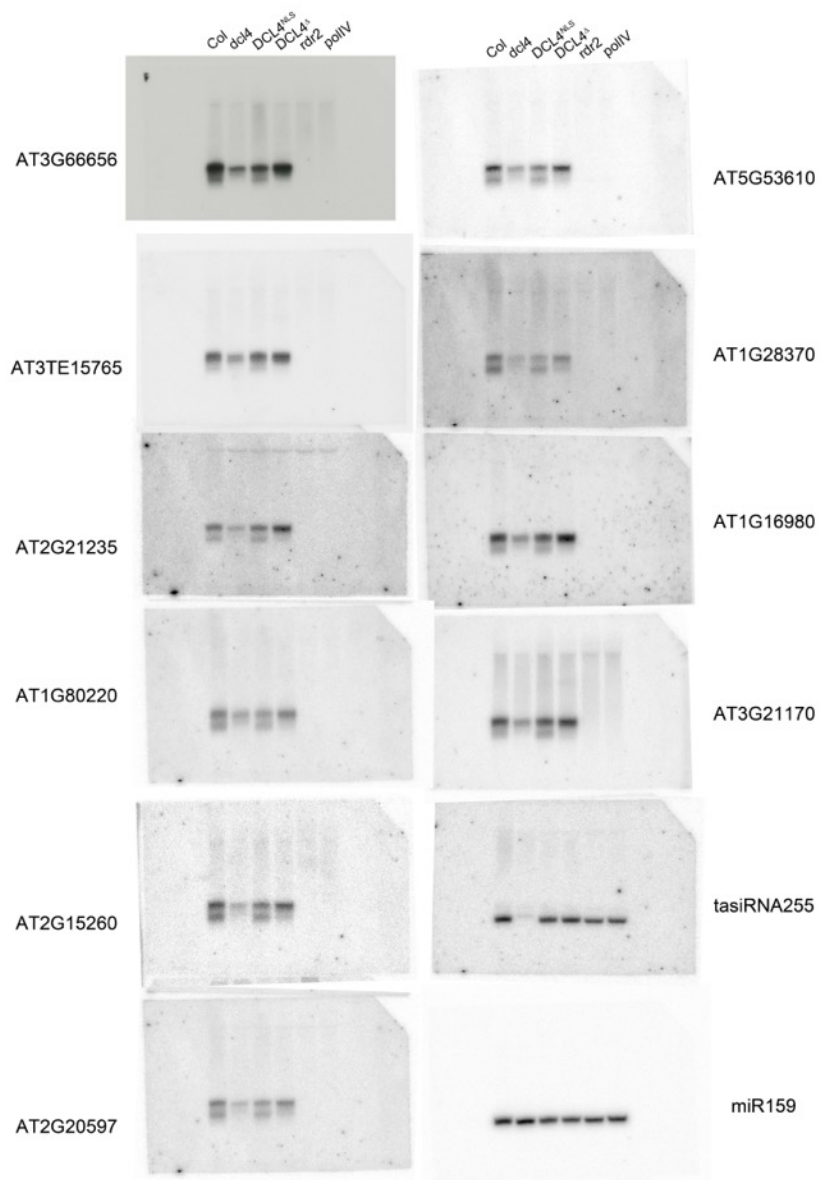

Figure 7D

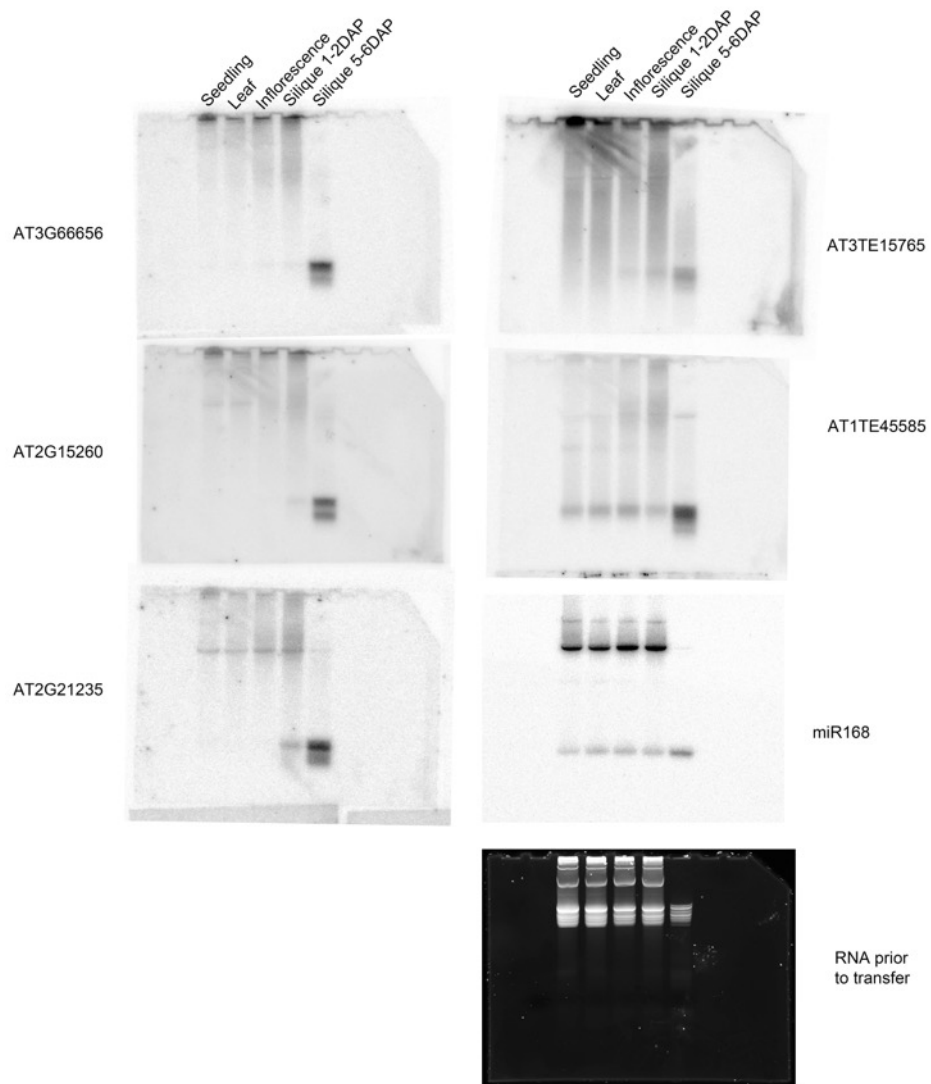



Figure 8B

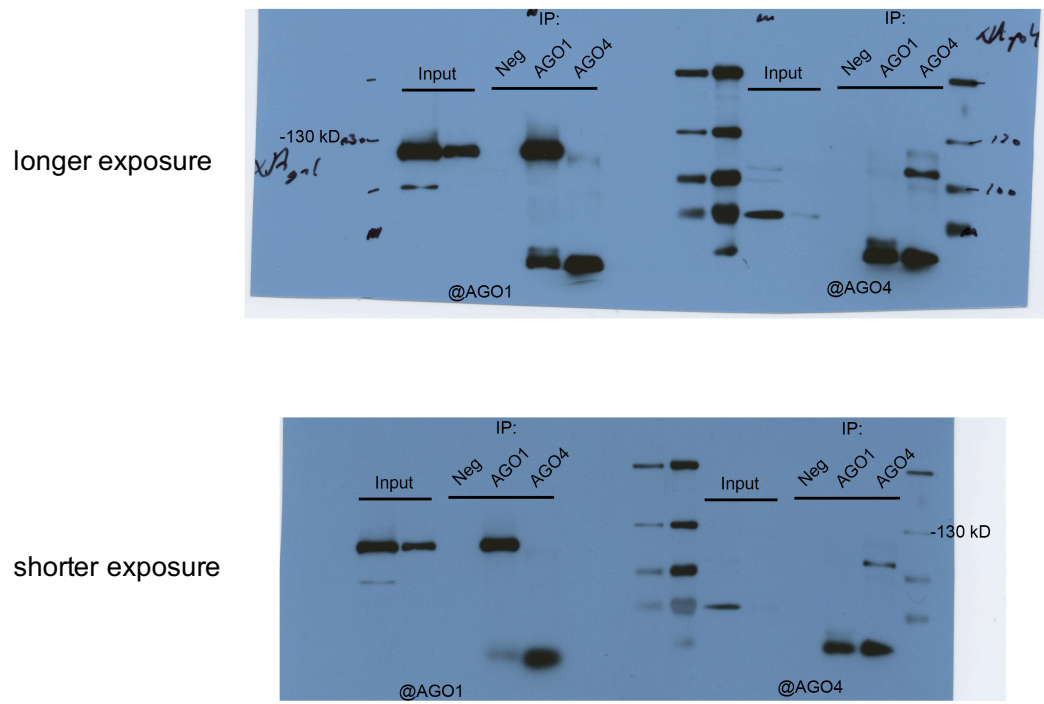

Figure 8C

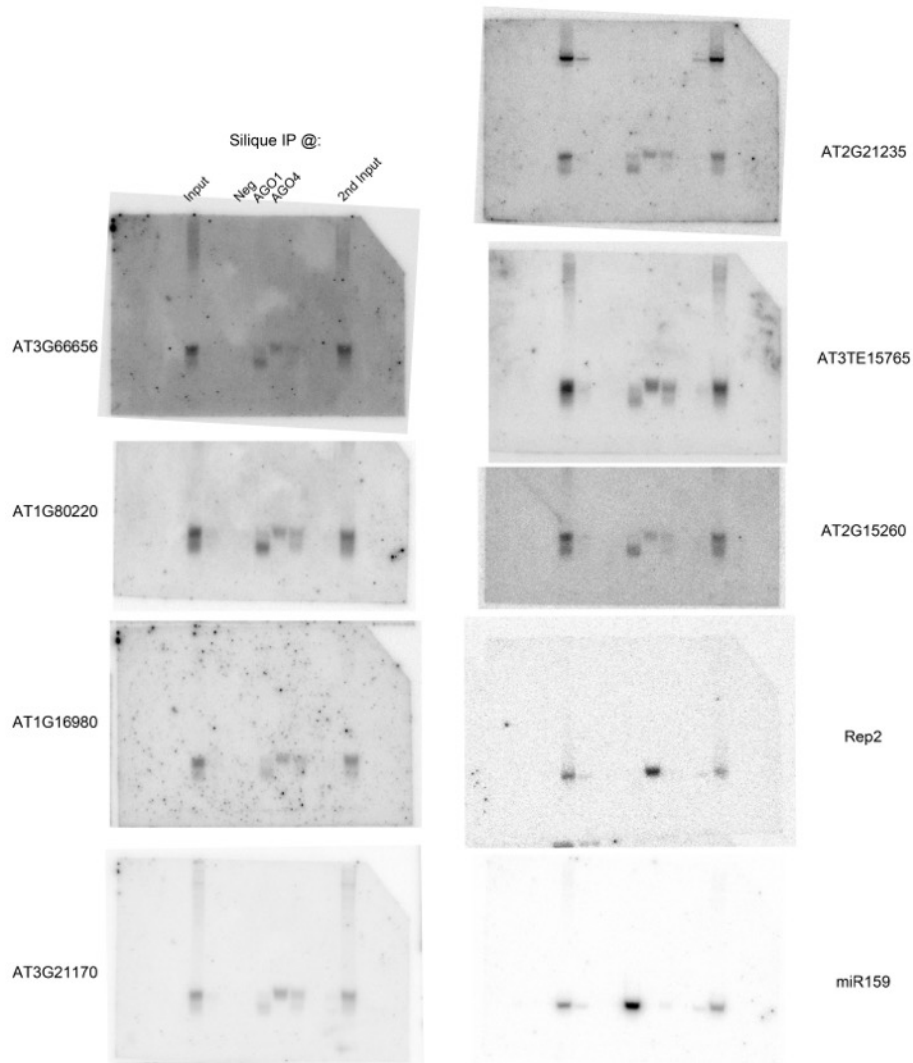

Supplement: supp_tpc.16.00554_TPC2016-00554-RAR2_Supplemental_Data_Set_5.pdf [file supp_tpc.16.00554_TPC2016-00554-RAR2_Supplemental_Data_Set_5.pdf]
